# Supplementary material for: Fabrication of nanofibres with azopyridine compounds in various acids and solvents
Source: Royal Society of Chemistry journal article supplement (doi:10.1039/c5ra02089a), 2015-01-01
Supplement: c5ra02089a1.pdf [file c5ra02089a1.pdf]

Supporting Information

## Fabrication of Nanofibres with Azopyridine Compound in Inorganic Acids

*Yinjie Chen,<sup>a</sup> Maohua Quan,<sup>a</sup> Haifeng Yu,<sup>\*b,c</sup> Lanying Zhang,<sup>b</sup> Huai Yang<sup>\*a,b,c</sup> and Yunfeng Lu<sup>d</sup>*

<sup>a</sup> Department of Materials Physics and Chemistry, University of Science and Technology Beijing, Beijing 100083, P. R. China.

<sup>b</sup> Department of Materials Science and Engineering, College of Engineering, Peking University, Beijing 100871, P. R. China. E-mail: yanghuai@coe.pku.edu.cn; yuhaifeng@pku.edu.cn.

<sup>c</sup> Key Laboratory of Polymer Chemistry and Physics of Ministry of Education, Peking University, Beijing 100871, P. R. China.

<sup>d</sup> Department of chemical and Biomolecular Engineering, University of California, Los Angeles, California 90095, USA.

### 1. The DSC of A12AzPy

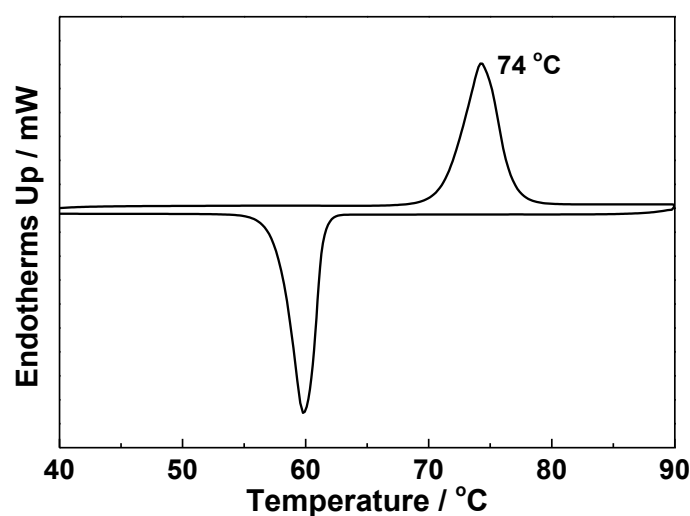

Figure S1. The DSC measurements of the A12AzPy.

## 2. The pKa values of inorganic acids

**Table S1.** The pKa values of different inorganic acids.

| No. | Name            | Chemical Formula               | Ka                           | pKa   |
|-----|-----------------|--------------------------------|------------------------------|-------|
| 1   | Boric acid      | H <sub>3</sub> BO <sub>3</sub> | 5.8 × 10 <sup>-10</sup> (K1) | 9.2   |
|     |                 |                                | 1.8 × 10 <sup>-13</sup> (K2) | 12.7  |
|     |                 |                                | 1.6 × 10 <sup>-14</sup> (K3) | 13.8  |
| 2   | Nitric acid     | HNO <sub>3</sub>               | 2.0 × 10                     | -1.3  |
| 3   | Sulfuric acid   | H <sub>2</sub> SO <sub>4</sub> | 1.0 × 10 <sup>3</sup> (K1)   | -3.0  |
|     |                 |                                | 1.0 × 10 <sup>-2</sup> (K2)  | 2.0   |
| 4   | Phosphoric acid | H <sub>3</sub> PO <sub>4</sub> | 7.5 × 10 <sup>-3</sup> (K1)  | 2.1   |
|     |                 |                                | 6.3 × 10 <sup>-8</sup> (K2)  | 7.2   |
|     |                 |                                | 4.4 × 10 <sup>-13</sup> (K3) | 12.4  |
| 5   | Perchloric acid | HClO <sub>4</sub>              | 1.0 × 10 <sup>10</sup>       | -10.0 |

**Table S2.** The pKa values of different halogen acids.

| No. | Name              | Chemical Formula | Ka                     | pKa   |
|-----|-------------------|------------------|------------------------|-------|
| 1   | Hydrofluoric acid | HF               | 6.6 × 10 <sup>-4</sup> | 3.2   |
| 2   | Hydrochloric acid | HCl              | 1.6 × 10 <sup>2</sup>  | -2.2  |
| 3   | Hydrobromic acid  | HBr              | 1.0 × 10 <sup>9</sup>  | -9.0  |
| 4   | Hydroiodic acid   | HI               | 1.0 × 10 <sup>10</sup> | -10.0 |

### 3. The pH values of A12AzPy, acids and self-organization fibres in THF

**Table S3.** The pH values of A12AzPy, acids and self-organization fibers in THF. Here, 0.05 ml acids and 0.02 g A12AzPy in 1 ml THF solution was used.

| No. | Compounds                             | pH   | Compounds                                      | pH   |
|-----|---------------------------------------|------|------------------------------------------------|------|
| 1   | THF                                   | 4.28 | A12AzPy in THF                                 | 6.16 |
| 2   | HCl in THF                            | 0.98 | A12AzPy/HCl in THF                             | 1.52 |
| 3   | HNO <sub>3</sub> in THF               | 1.29 | A12AzPy/HNO <sub>3</sub> in THF                | 2.07 |
| 4   | H <sub>2</sub> SO <sub>4</sub> in THF | 0.66 | A12AzPy/H <sub>2</sub> SO <sub>4</sub> in THF  | 1.22 |
| 5   | H <sub>3</sub> PO <sub>4</sub> in THF | 2.28 | A12AzPy/ H <sub>3</sub> PO <sub>4</sub> in THF | 2.97 |

### 4. The Morphology of fabricated fibers from various organic solvents

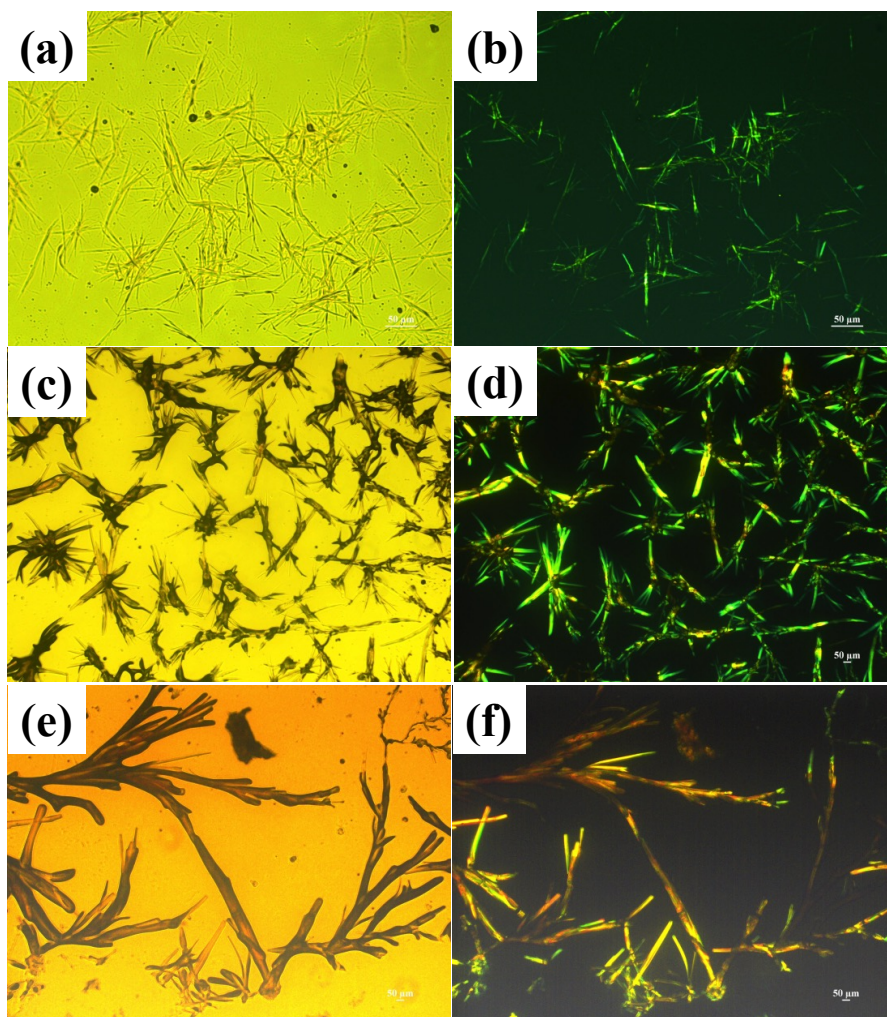

**Figure S2.** The optical (a, c, e) and the POM (b, d, f) pictures of the fabricated fibres which formed with sulfuric acid made in (a) acetone, (b) DMF and (c) DMSO at room temperature.

## 5. The Morphology of fabricated fibers from various organic solvents

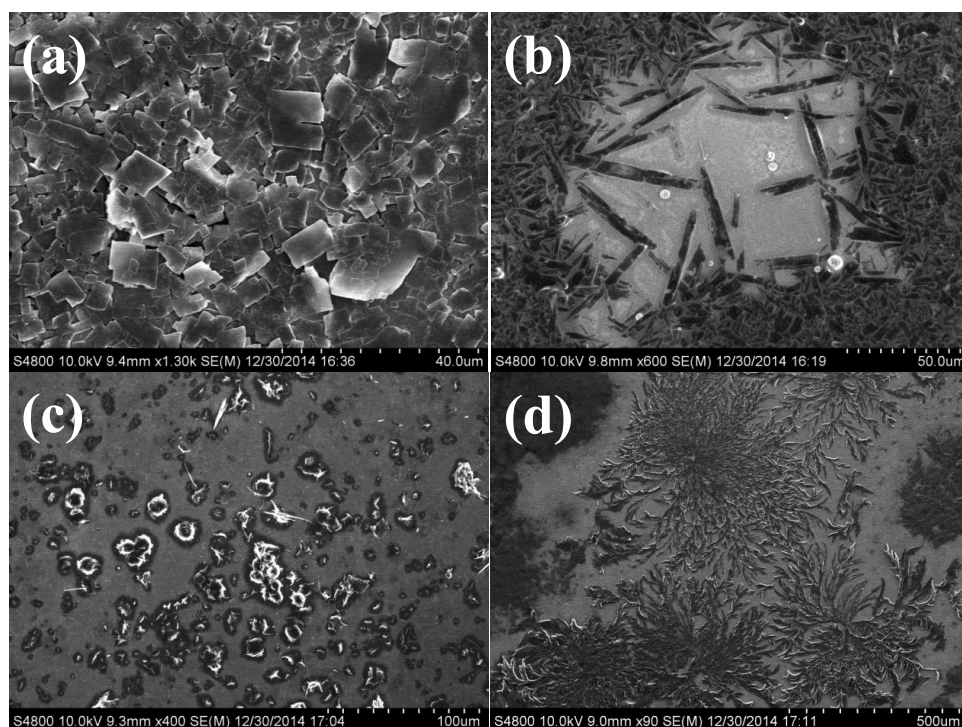

**Figure S3.** The SEM pictures of the fabricated fibres formed with sulfuric acid from different organic solvents at room temperature. (a) Dichloromethane, (b) toluene, (c) petroleum ether, and (d) chloroform.

## 6. The TEM of A12AzPy

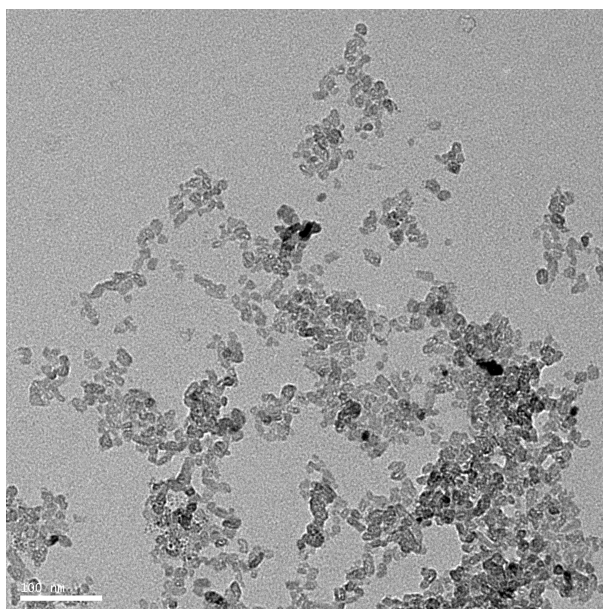

**Figure S4.** The TEM of pure A12AzPy.

## 7. The FT-IR analysis of LMW fibres

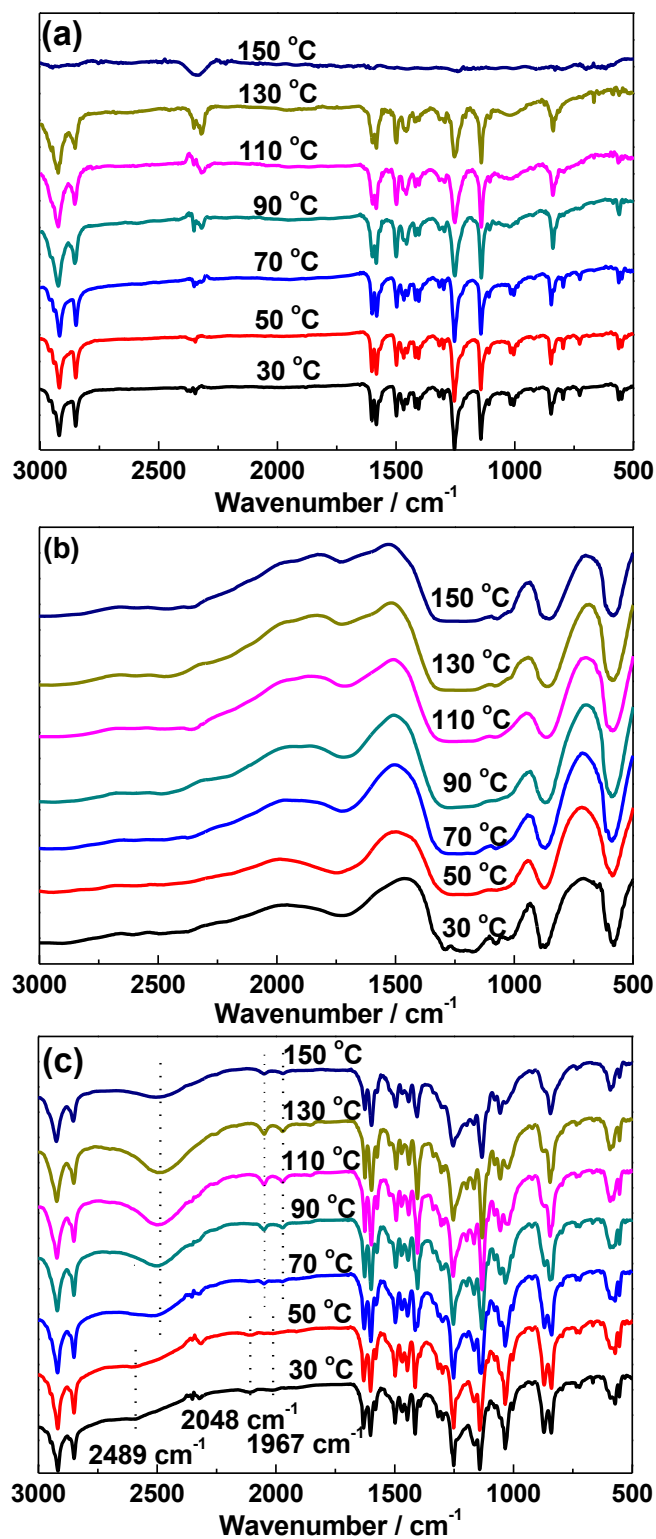

**Figure S5.** The temperature dependent FT-IR spectra of the samples. (a) A12AzPy, (b)  $\text{H}_2\text{SO}_4$  and (c) LMW fibres.

## 8. UV-vis absorption analysis

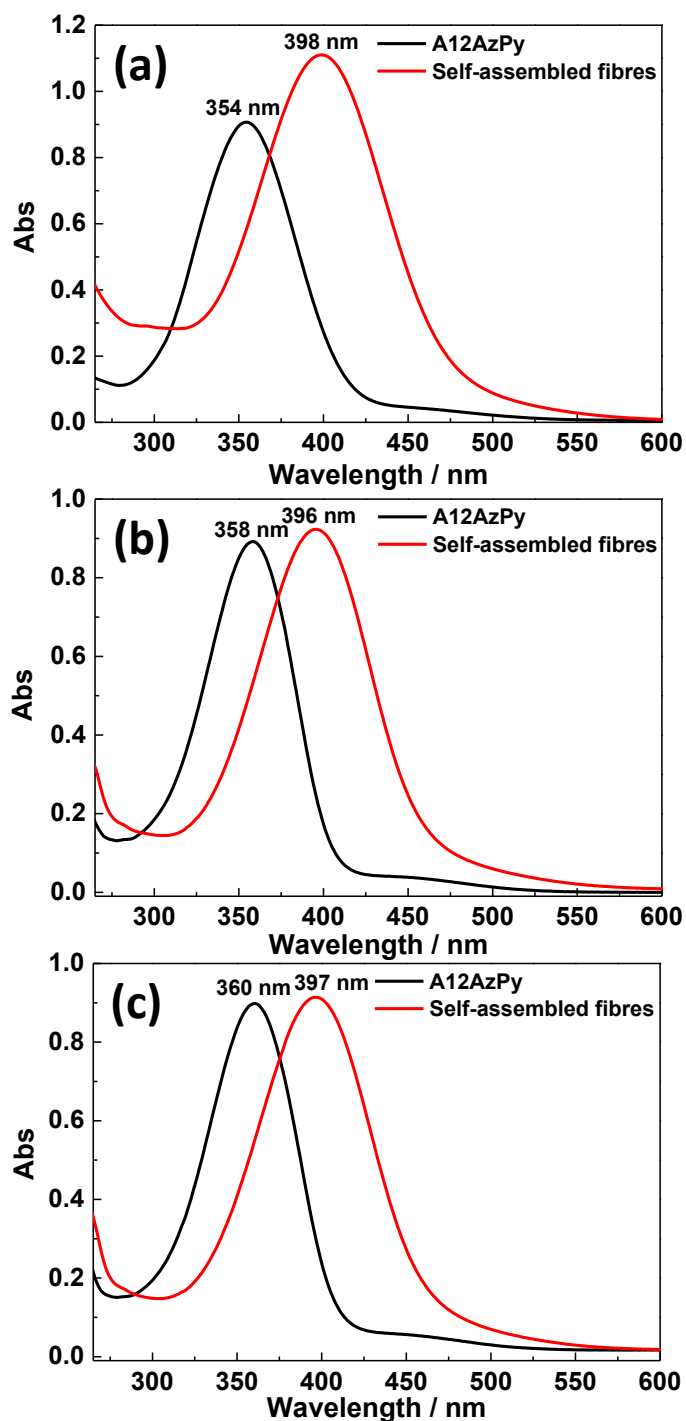

**Figure S6.** UV-vis absorption spectra of the A12AzPy and self-assembled fibres in Acetone (a), DMF (b) and DMSO (c) solution.

## 9. The Fluorescence spectra of LMW fibres

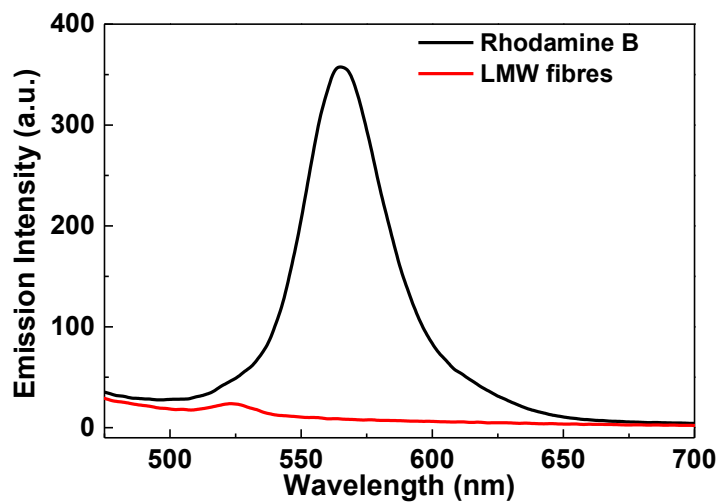

**Figure S7.** The fluorescence emission spectra of LMW fibres in THF. And the excitation at 456 nm.

Fluorescence quantum yield measurements, using Rhodamine B as reference ( $\Phi_f=0.9$ ) in ethanol, were performed at room temperature for a THF solution with LMW fibres. As shown in Figure S5, the LMW fibres in THF solution showed a weak emission at 523 nm and the measured fluorescence quantum yield ( $\Phi_f$ ) is 0.065.
